# Supplementary material for: Last Aid Training Online: Participants’ and Facilitators’ Perceptions from a Mixed-Methods Study in Rural Scotland
Source: MDPI journal article supplement (doi:10.3390/healthcare10050918), 2022-05-16
Supplement: s1 [file s1]

## **Creating Compassionate Virtual Rural Communities to support Palliative / End of Life Care needs in the Highlands**

### **Survey information and consent**

Creating Compassionate Virtual Rural Communities to support Palliative / End of Life Care needs in the Highlands is a collaborative project between the Highland Hospice and University of the Highlands and Islands.

The Last Aid training programme delivered by the Highland Hospice aims to promote death literacy and raise awareness on palliative and end of life care issues among the general public.

As you may be aware, this training that has normally been delivered face to face given its sensitive nature is now having to be delivered online due to COVID – 19 restrictions. We are keen to evaluate the impact of this training on your knowledge, understanding, awareness and confidence related to palliative and end of life care issues and decisions.

Your contribution to this research is most welcome and your participation is completely voluntary. **Your results are anonymous, and no identifying features are collected.** The survey should take no more than 30 minutes to complete. You would also be able to complete parts of the survey and resume completion.

Everyone who takes part in the survey will be eligible to participate in interviews that are planned as part of this project. If you wish to be considered as a participant for the interviews, you will be asked to provide your email address at the end of this survey, which will only be used for this purpose and will be deleted once the interview is completed.

This project has been approved by the University Research Ethics Committee at University of the Highlands & Islands.

If you have any questions about the survey, or the wider project, please contact **Dr Leah Macaden who is leading this project** by email at **leah.macaden@uhi.ac.uk**.

## **1. DEMOGRAPHIC AND SOCIAL VARIABLES**

### **Age**

- 18 - 24 years
- 25 - 34 years
- 35 - 44 years
- 45 - 54 years
- 55 - 64 years
- 65 - 79 years
- 80+ years
- Rather not say

### **Gender**

- Female
- Male
- Non-binary (specify)
- Rather not say

### **What is the highest level of education you have completed?**

- National 5 or equivalent
- Highers or equivalent
- Certificate or Diploma
- Undergraduate degree
- Postgraduate degree
- Other (specify)
- Rather not say

### **Employment status (Please select the most appropriate)**

- Employed - full time
- Employed – part time
- Self-employed
- Not working
- Retired

- Student
- Rather not say

### Employer

- The NHS
- Social Care
- Third Sector
- Education
- Other
- Rather not say

### Residence

- Urban area
- Semi-urban area
- Rural area
- Remote area
- Rather not say

### Relationship status (Please select the most appropriate response):

- Married/defacto
- Never married/defacto
- Widowed
- Divorced
- Separated but not divorced
- Partnered but not living together
- Single
- Other (specify)
- Rather not say

### Community Connections / Networks:

| Support / Network | Yes | No |
|-------------------|-----|----|
| Neighbours        |     |    |
| Community Groups  |     |    |
| Religious Groups  |     |    |
| Friends           |     |    |

### Do you have a religious or spiritual background?

- Yes (please specify)

- No
- Rather not say

Do you have a current religious or spiritual practice?

- Yes (please specify)
- No
- Rather not say

**Reason for choosing to attend the Last Aid Training Programme**

- Personal interest in the subject
- COVID – 19
- Long term Condition – Self / Spouse / Others
- Terminal Illness - Self / Spouse / Others
- Related to your area of work

**How did you source / access information on the Last Aid Training Programme?**

- Friends
- Family
- Colleague
- Email
- Social Media
- Highland Hospice Newsletter / Website

Please Respond Using **Yes / No** to the following about any related work or previous training experience:

1. I do paid work or have done paid work with people at end of life
2. I volunteer or have volunteered with people at end of life
3. I do paid work or have done paid work in a job where I support/ed people through grief and loss
4. I volunteer or have volunteered in a job where I support/ed people through grief and loss
5. I have attended training on helping people with dying, grief or bereavement

**The following sections focus on how and if the Last Aid Online Training Programme has influenced your knowledge, understanding and attitudes on Death and Dying and your confidence in caring for someone with End of Life Care needs**

## **1. ATTITUDES TOWARDS DEATH AND DYING**

**How would you rate your level of agreement with the following statements using the scale below?**

**1 Strongly Disagree 2 – Disagree 3 – Unsure 4 – Agree 5 – Strongly Agree**

|                                                                                                     | Before<br>Last Aid<br>Training | After<br>Last Aid<br>Training | Not<br>Applicable |
|-----------------------------------------------------------------------------------------------------|--------------------------------|-------------------------------|-------------------|
| We discuss death and dying in my community                                                          |                                |                               |                   |
| We discuss death and dying in my family                                                             |                                |                               |                   |
| We discuss death and dying in my workplace                                                          |                                |                               |                   |
| We discuss death and dying in my church / religious gathering                                       |                                |                               |                   |
| I normally avoid the topic of death and dying                                                       |                                |                               |                   |
| I normally avoid people who are grieving                                                            |                                |                               |                   |
| I normally tend to avoid conversations about dying and death to avoid upsetting people              |                                |                               |                   |
| I normally tend to avoid conversations about dying and death because it makes me feel uncomfortable |                                |                               |                   |

## **2. KNOWLEDGE AND CONFIDENCE ON DEATH AND DYING**

### **2.1 PRACTICAL KNOWLEDGE ABOUT DEATH AND DYING**

**How would you rate your level of confidence with the following care duties using the scale below?**

**1 - Not at all confident 2 – Not very confident 3 – Somewhat/reasonably confident 4 – Confident 5 – Very confident**

| <b>My confidence in:</b>                                                           | <b>Before<br/>Last Aid<br/>Training</b> | <b>After<br/>Last Aid<br/>Training</b> | <b>Not<br/>Applicable</b> |
|------------------------------------------------------------------------------------|-----------------------------------------|----------------------------------------|---------------------------|
| Talking about death, dying or grieving to a close friend                           |                                         |                                        |                           |
| Talking about death, dying or grieving to a child                                  |                                         |                                        |                           |
| Talking to a newly bereaved person about their loss                                |                                         |                                        |                           |
| Talking to a GP about support at home or in their place of care for a dying person |                                         |                                        |                           |
| Talking to someone who is dying                                                    |                                         |                                        |                           |
| Recognising common symptoms experienced by people at the end of life               |                                         |                                        |                           |
| Providing comfort care at the end of life (using non-drug methods)                 |                                         |                                        |                           |
| Feeding a person or assisting them to eat and drink as desired                     |                                         |                                        |                           |
| Bathing a person                                                                   |                                         |                                        |                           |
| Lifting a person or assisting to transfer them                                     |                                         |                                        |                           |
| Administering medications to someone who is dying                                  |                                         |                                        |                           |

## **2.2 EXPERIENTIAL KNOWLEDGE**

**How comfortable are you with the following aspects using the scale below?**

**1 – Not at all comfortable 2 – Not very comfortable; 3 – Somewhat/reasonably comfortable 4 – Comfortable; 5 – Very comfortable**

| <b>End of Life Care Decision Making &amp; Emotions</b>         | <b>Before<br/>Last Aid<br/>Training</b> | <b>After<br/>Last Aid<br/>Training</b> | <b>Not<br/>Applicable</b> |
|----------------------------------------------------------------|-----------------------------------------|----------------------------------------|---------------------------|
| Initiating End of Life Care decisions about myself             |                                         |                                        |                           |
| Initiating End of Life Care conversations with a family member |                                         |                                        |                           |
| Participating in Advance Care Planning for myself              |                                         |                                        |                           |
| Participating in Advance Care Planning for a family member     |                                         |                                        |                           |
| Participating in Advance Care Planning for a friend            |                                         |                                        |                           |
| Supporting others with death and dying processes               |                                         |                                        |                           |

|                                                                            |  |  |  |
|----------------------------------------------------------------------------|--|--|--|
| Prioritising what is important and not important in life                   |  |  |  |
| Being compassionate or kind towards myself                                 |  |  |  |
| Empathising with others                                                    |  |  |  |
| Accessing skills and strategies to cope myself emotionally                 |  |  |  |
| Using my skills and strategies to support others facing similar challenges |  |  |  |

**How would you rate your knowledge and understanding on the following aspects (2.3 & 2.4) of End of Life Care using the scale below?**

**1-None 2-Weak 3-Fair 4-Good 5-Very Good**

### **2.3 FACTUAL KNOWLEDGE**

| <b>My Knowledge &amp; Understanding on:</b>                                             | <b>Before Last Aid Training</b> | <b>After Last Aid Training</b> | <b>Not Applicable</b> |
|-----------------------------------------------------------------------------------------|---------------------------------|--------------------------------|-----------------------|
| What a Do Not Attempt Cardiopulmonary Resuscitation (DNACPR form) is and how it is used |                                 |                                |                       |
| What a Treatment Escalation Plan is and how it is used?                                 |                                 |                                |                       |
| What documents you need to complete in planning for death                               |                                 |                                |                       |
| How to navigate the health care system to support a dying person to receive care        |                                 |                                |                       |
| How to access palliative care in my area                                                |                                 |                                |                       |
| What constitutes quality of end of life                                                 |                                 |                                |                       |
| The law regarding what to do after a death in Scotland                                  |                                 |                                |                       |
| How to navigate funeral services and options                                            |                                 |                                |                       |
| The contribution the funeral director can make at end of life                           |                                 |                                |                       |

### **2.4 KNOWLEDGE ON COMMUNITY RESOURCES**

| <b>My Knowledge &amp; Understanding on:</b>               | Before Last Aid Training | After Last Aid Training | Not Applicable |
|-----------------------------------------------------------|--------------------------|-------------------------|----------------|
| Accessing community support available                     |                          |                         |                |
| Providing day to day care for the dying person            |                          |                         |                |
| Accessing equipment required for care                     |                          |                         |                |
| Accessing culturally appropriate support                  |                          |                         |                |
| Accessing emotional support for myself                    |                          |                         |                |
| Support groups for people with life threatening illnesses |                          |                         |                |
| Support groups for people who are dying                   |                          |                         |                |
| Support groups for carers for people who are dying        |                          |                         |                |
| Support groups for people who are grieving                |                          |                         |                |

### 3. DECISION MAKING AND INTENTIONS TO SUPPORT END OF LIFE CARE NEEDS

Have you **ever** undertaken or intend to undertake any of the following actions?

| <b>My Decisions / Intentions to support End of Life Care Needs</b>                                                 | Before Last Aid Training | After Last Aid Training | Do not wish to disclose |
|--------------------------------------------------------------------------------------------------------------------|--------------------------|-------------------------|-------------------------|
| I have made / plan to make a will                                                                                  |                          |                         |                         |
| I have appointed / plan to appoint someone to make decisions regarding finances or property e.g. Power of Attorney |                          |                         |                         |
| I have made / plan to have an advance care plan in place                                                           |                          |                         |                         |
| I have helped / intend to support someone to make plans for end of life e.g. advance care plans, funerals etc      |                          |                         |                         |
| I have provided/ intend to provide emotional support to a person who is dying                                      |                          |                         |                         |
| I have helped/intend to help someone who is supporting a dying person by providing emotional help to carer         |                          |                         |                         |
| I have supported / intend to support with the hands-on care of a person who is dying                               |                          |                         |                         |



|                                                                                                                                |  |  |  |
|--------------------------------------------------------------------------------------------------------------------------------|--|--|--|
| I have given medications / intend to support with administering medicines to a person who is dying if such a need should arise |  |  |  |
| I have kept / intend to keep someone company who is near death                                                                 |  |  |  |
| I have helped care / intend to care for the body of someone who has died                                                       |  |  |  |
| I was /am interested in facilitating an End of Life support group (Face to Face)                                               |  |  |  |
| I was /am interested in facilitating an End of Life support group (Virtually)                                                  |  |  |  |
| I was / am interested to set up an End of Life Care support group in my local community                                        |  |  |  |

#### 4. COMMENTS / SUGGESTIONS

##### a. Please complete the following from your experience of attending the Last Aid Training

| Modules | Topics                       | Strengths | Limitations | Suggestions  |                |                           |
|---------|------------------------------|-----------|-------------|--------------|----------------|---------------------------|
|         |                              |           |             | Keep Content | Delete Content | Add Information / Content |
| 1       | Death as normal part of life |           |             |              |                |                           |
| 2       | Planning ahead               |           |             |              |                |                           |
| 3       | Relieving suffering          |           |             |              |                |                           |
| 4       | Final Goodbyes               |           |             |              |                |                           |

##### b. Suggestions on preferred modes for future delivery of the Last Aid Training Programme

| Preferred Mode of Delivery | Yes | No |
|----------------------------|-----|----|
| Face to Face               |     |    |
| Virtual                    |     |    |
| Small Group Interaction    |     |    |

**c. What was your one Take Home Message from this training?**

**d. What would be the one End of Life Care Decision you have thought about most during or since your Last Aid training?**

Would you like to participate in the interviews for this project? **Yes / No**

**If your response is Yes, please provide us with your email address in the box below which will be used only for the purpose of contacting you to arrange a convenient date and time for your interview.**
